# Supplementary material
Source: ML conference proceedings conference paper supplement (https://proceedings.neurips.cc/paper_files/paper/2017/hash/fec8d47d412bcbeece3d9128ae855a7a-Abstract.html)
Supplement: Supplementary file 3 [file fec8d47d412bcbeece3d9128ae855a7a-Supplemental.zip]

Archive with 3 entries (2 files):
- neuralfdr_supp.pdf
- __MACOSX/
- __MACOSX/._neuralfdr_supp.pdf
